# Supplementary material for: Antioxidant Properties of Buffalo-Milk Dairy Products: A β-Lg Peptide Released after Gastrointestinal Digestion of Buffalo Ricotta Cheese Reduces Oxidative Stress in Intestinal Epithelial Cells
Source: MDPI journal article supplement (doi:10.3390/ijms19071955), 2018-07-04
Supplement: s1 [file s1]

## Antioxidant Properties of Buffalo-Milk Dairy Products: A $\beta$ -Lg Peptide Released after Gastrointestinal Digestion of Buffalo Ricotta Cheese Reduces Oxidative Stress in Intestinal Epithelial Cells

### S1. DPPH• Radical Scavenging Activity

The DPPH• scavenging activities were determined according to the method previously described by García-Moreno et al. (2014), with some minor modifications. Briefly, a volume of 100  $\mu$ L (concentration range 0.3–10.0 mg mL<sup>-1</sup>) of each sample solution was added to 100  $\mu$ L of DPPH• radical ( $5 \times 10^{-5}$  M) in methanol. The mixture was briefly sonicated then left to react for 30 minutes in the dark at room temperature. Then, the absorbance of the reaction mixture was measured at 517 nm. A control solution was prepared by diluting the DPPH solution with methanol in a 1:1 ratio ( $A_{\text{DPPH\_control}}$ ). EC<sub>50</sub> values were measured as the sample concentration (mg/mL) giving a 50% decrease of the DPPH radical initial concentration and were calculated according to Equation (1):

$$\text{DPPH inhibition \%} = [(A_{\text{DPPH\_control}} - A_{\text{DPPH\_sample}}) / A_{\text{DPPH\_control}}] \times 100 \quad (1)$$

**Table S1.** Radical scavenging activity (DPPH• test) of intestinal digesta of buffalo-milk dairy products.

| Buffalo-milk dairy products <sup>#</sup> | EC <sub>50</sub> <sup>*</sup> | Equation               | R <sup>2</sup> |
|------------------------------------------|-------------------------------|------------------------|----------------|
| Ricotta                                  | 1.91                          | $y = 6.6919x - 1.4372$ | 0.9975         |
| Grana                                    | 2.13                          | $y = 6.037x - 0.9197$  | 0.9777         |
| Yogurt                                   | 2.20                          | $y = 5.677x - 0.6423$  | 0.9816         |
| Ice Cream                                | 3.93                          | $y = 13.808x - 2.9734$ | 0.9972         |
| Mozzarella                               | 4.16                          | $y = 16.168x - 3.9204$ | 0.9927         |
| Scamorza                                 | 4.26                          | $y = 11.460x - 1.4731$ | 0.9886         |

### References

García-Moreno, P.J.; Batista, I.; Pires, C.; Bandarra, N.M.; Espejo-Carpio, F.J.; Guadix, A.; Guadix, E.M. Antioxidant activity of protein hydrolysates obtained from discarded Mediterranean fish species. *Food Res Int.* **2014**, *65*, 469-476.
